# Supplementary material for: Spatiotemporally resolved emissions and concentrations of Styrene, Benzene, Toluene, Ethylbenzene, and Xylenes (SBTEX) in the U.S. Gulf region
Source: Copernicus journal article supplement (doi:10.5194/essd-2023-207), 2023-06-07
Supplement: Supplementary file 1 [file essd-2023-207-supplement.pdf]

1 **High spatiotemporally resolved emissions and concentrations of Styrene,**  
2 **Benzene, Toluene, Ethylbenzene, and Xylenes (SBTEX) in the U.S. Gulf region**

3 Chi-Tsan Wang<sup>1</sup>, Bok H. Baek<sup>1\*</sup>, William Vizuete<sup>2</sup>, Jia Xing<sup>1</sup>, Jaime Green<sup>2</sup>, Marc Serre<sup>2</sup>, Richard  
4 Strott<sup>2</sup>, Lawrence S. Engel<sup>3</sup>, Jared Bowden<sup>4</sup>, and Jung-Hun Woo<sup>5</sup>

5 <sup>1</sup>Center for Spatial Information Science and Systems (CSISS), George Mason University, Fairfax,  
6 VA, U.S.

7 <sup>2</sup>Department of Environmental Sciences & Engineering, University of North Carolina, Chapel Hill,  
8 NC, U.S.

9 <sup>3</sup>Department of Epidemiology, University of North Carolina, Chapel Hill, NC, U.S.

10 <sup>4</sup>Departement of Applied Ecology, North Carolina State University, Raleigh, NC, U.S.

11 <sup>5</sup>Civil and Environmental Engineering, College of Engineering, Konkuk University, Seoul,  
12 Republic of Korea

13 \*Corresponding authors: Bok H. Baek (Email: bhbaek@gmail.com; Telephone: +1 919-308-6519)

14 **Supplementary document:**

15

16 **1. Emission Data**

17 We applied the USEPA’s 2011 National Emission Inventory (NEI) Emissions Modeling Platform  
18 (EMP) version 6 (USEPA, 2021b), based on the official 2011 NEI with the SMOKE model system  
19 to generate the year 2012 gridded hourly emissions for the CAMx modeling. The following  
20 emission source types were processed: 1) area, 2) point, 3) mobile, and 4) biogenic source types.  
21 The area emission sources included the following emission sectors: fugitive dust (afdust),  
22 commercial marine vessels (cmv), non-point source oil and gas industry (np\_oilgas), rail,  
23 agriculture (ag), agriculture fire (agfire), non-point (nonpt), and nonroad. The stationary point  
24 sources included stationary point electric generating units (ptegu), point source fire or wildfire  
25 (ptfire), point source from non-electric generating unit point source (ptnonipm, which include most  
26 industrial processes but exclude the “egu” and “oilgas” industry), and point source oil and gas  
27 (pt\_oilgas) sectors. The details of these emission sectors can be found in the technical supporting

28 document (TSD) from the 2011 NEI EMP (USEPA, 2021b). The SBTEX emission from original  
29 NEI are shown in Table S1.

30 The official USEPA's NEI reported the county-level annual or monthly total emissions of criteria  
31 air pollutants (CAPs), including carbon monoxide (CO), nitrogen dioxide (NO<sub>x</sub>), sulfur dioxide  
32 (SO<sub>2</sub>), particulate matter (PM), and VOC. The SMOKE model system processed these county  
33 total emissions inventories and generated the spatially gridded and chemically speciated hourly  
34 emission data of model species for the CTM. In this study, the reduced chemical mechanism,  
35 Carbon Bond 06 revision 4 (CB6r4) (Yarwood and Jung, 2010), is applied to simulate the  
36 chemistry process. The CB6 mechanism uses 22 surrogate VOC species to represent all VOC-  
37 related compounds in the atmosphere (Ramboll, 2020b), such as aldehyde (ALDX), formaldehyde  
38 (FORM), acetone (ACET), methane (CH<sub>4</sub>), methanol (MEOH), benzene (BENZ), and others.  
39 Thus, the CTM employs these surrogate model species and reduced chemical mechanisms to  
40 simulate the radical cycle reactions of HO<sub>x</sub> (OH and HO<sub>2</sub>) and NO<sub>x</sub> (NO and NO<sub>2</sub>), the ozone  
41 formation process, and other secondary air pollutants like PM<sub>2.5</sub> (Steyn and Rao, 2010).

42 According to the USEPA SPECIATE database documents (Simon et al., 2010; USEPA, 2021a)  
43 and the chemical speciation tool (Ramboll, 2020b), the CB6 model species like TOL and XYL  
44 can be derived from the explicit SBTEX chemical species; however, they are not limited to SBTEX.  
45 In fact, hundreds of real VOC species similar in chemical structure to Toluene and Xylene are  
46 included in the surrogate species, TOL and XYL (Ramboll, 2020b). Thus, the model species can  
47 not represent the explicit xylenes and toluene chemical compounds while they share the names of  
48 these species in the CTM model.

49

## 50 **2. Air Quality Modeling**

51 The Comprehensive Air Quality Model with Extensions version 7.0, CAMx7.0 (RAMBOLL 2020)  
52 was implemented in this study to predict the SBTEX concentrations in the atmosphere. The base  
53 model simulation period is from April 20<sup>th</sup> to September 30<sup>th</sup>, 2012 (April 20<sup>th</sup> to April 30<sup>th</sup> are  
54 spin-up dates). The evaluated meteorological data from WRF version 3.8 over the U.S. continental  
55 region are provided by the USEPA Support Center for Regulatory Atmospheric Modeling

56 (SCRAM) (USEPA, 2022). They are converted to the CAMx-ready format using the WRFCAMx  
57 version 4.8.1 program developed by the CAMx development team (Ramboll, 2020a). The  
58 photodissociation coefficients are calculated by the Tropospheric Ultraviolet-Visible (TUV)  
59 Radiation Model (Madronich, 1987) with Ozone Monitoring Instrument (OMI) daily data (NASA,  
60 2021). The USEPA daily hemisphere CMAQ model results are used to calculate the boundary  
61 condition and initial condition (Hogrefe et al., 2021). The chemical mechanism is Carbon Bond  
62 06 revision 4 (CB6r4) (Ramboll, 2020b). Figure 1 in manuscript shows that the main model  
63 domain is 12 km × 12 km (blue rectangle), with flexi-nesting to 4 km × 4 km (red rectangle).

64 To accurately simulate the decay of individual SBTEX, the base CAMx modeling results are  
65 immediately processed through the reactive tracer (RTRAC) post-processing step in CAMx. The  
66 base model predicted hourly oxidant concentrations, such as ozone (O<sub>3</sub>), hydroperoxyl radical  
67 (OH), and nitrate radical (NO<sub>3</sub>); those hourly oxidant concentrations and dry/wet depositions were  
68 used to estimate the decay of SBTEX concentrations. Thus, it is critical to confirm that the CAMx  
69 model can reasonably represent the oxidants concentrations in the base modeling run. The CAMx  
70 predictions are statistically evaluated with the 87 ozone monitoring sites data in the 4 km × 4 km  
71 model domain. The base modeling ozone evaluation results over the simulation period are shown  
72 in Table S2. The evaluation indicators followed the USEPA's model evaluation guidance (USEPA,  
73 2006). It should be noted that the purpose of the base model is not for the ozone State  
74 Implementation Plan (SIP) or ozone control, but to simulate the SBTEX concentrations using the  
75 RTRAC feature in the CAMx modeling system. Therefore, the ozone performance may not be as  
76 good as the ozone SIP modeling application over the nonattainment region, which is relatively  
77 smaller than our 4 km × 4 km domain. The base modeling is fairly performed well over the Gulf  
78 region states (Correlation Coefficient (R) ≥ 0.55). The ozone performances in Texas and Louisiana  
79 are close to the observed USEPA AQS stations (Texas: R = 0.79, NMB = 1%; Louisiana: R = 0.77,  
80 NMB = 11% ).

81 Additionally, because our base modeling shares the same simulation period as the Texas  
82 Commission on Environmental Quality (TCEQ) 2012 Ozone SIP modeling application (TCEQ,  
83 2016), we verified our modeling results with TCEQ's simulated OH radical-related model species,  
84 including ozone, NO<sub>2</sub>, and formaldehyde over the Dallas and Houston region. The detailed

85 comparisons are shown in the supplementary documents (Fig. S2) and indicate that both modeling  
86 applications share a similar, good modeling performance. For Ozone, R is 0.75 in Dallas and 0.84  
87 in Houston; for NO<sub>2</sub>, R is 0.58 in Dallas and 0.76 in Houston; and for Formaldehyde, R is 0.74 in  
88 Dallas and 0.78 in Houston. While the model domains, meteorological input data, gridded hourly  
89 emission patterns, and CAMx model versions are different between these two applications, our  
90 results support our conducting the Reactive Tracer post process with the base model.

### 91 **3 Missing HAPs emission from ptoilgas and ptonipm**

#### 92 **3.1 The Imputation HAPs Emission in Non-Point Oil and Gas Industry (np\_oilgas)**

93 Fig. S3 and Table S5 shows all adjusted emission of “np\_oilgas” (state total: 5803 t yr<sup>-1</sup>; model  
94 domain: 2912 t yr<sup>-1</sup>) are from Texas. Within this sector, increases in STEEX can be attributed to a  
95 specific SCC code. Table S6 shows details of emission behaviors emission in "np\_oilgas" for the  
96 imputation emission. The significant Toluene increases are associated with tank condensate (729  
97 t yr<sup>-1</sup>), crude oil loading (589 t yr<sup>-1</sup>), well dehydrator (581 t yr<sup>-1</sup>), oil well (115 t yr<sup>-1</sup>) and gas well  
98 (61 t yr<sup>-1</sup>) pneumatic devices in oil and gas exploration and production process. The Xylenes  
99 increases are from oil and gas production processes such as oil well artificial lift (such as beam  
100 pump) (2,062 t yr<sup>-1</sup>), produced water at oil well (426 t yr<sup>-1</sup>), hydraulic fracturing engines (91 t yr<sup>-1</sup>)  
101 <sup>1</sup>), and all processes at oil well (73 t yr<sup>-1</sup>). The Ethylbenzene imputations are from crude petroleum  
102 oil well pneumatic devices (162 t yr<sup>-1</sup>), storage tanks (109 t yr<sup>-1</sup>), gas well dehydrators (53 t yr<sup>-1</sup>),  
103 on-shore oil well pneumatic pumps (34 t yr<sup>-1</sup>) and produced water at the well (28 t yr<sup>-1</sup>). The  
104 imputations of Styrene in the "np\_oilgas" sector are relatively small (1.9 t yr<sup>-1</sup>), and most of them  
105 (69%) are from hydraulic fracturing engines. Other Styrene are from engine combustion (0.47 t yr<sup>-1</sup>)  
106 <sup>1</sup>, 24%) and artificial lift (0.13 t yr<sup>-1</sup>, 0.4%).

107 Figure S3 shows the STEEX-adjusted emission spatial distributions. In Fig. S3a, the largest Toluene  
108 emission increase (19 t yr<sup>-1</sup>) occurred near the industry in Beaumont, which has many industrial  
109 storage tanks. The largest Xylenes increase (Fig. S3b), 35 t yr<sup>-1</sup>, near Fort Worth city; the most  
110 significant Ethylbenzene increase (Fig. S3c), 4 t yr<sup>-1</sup>, is near Longview; the largest Styrene increase  
111 (Fig. S3d) 0.02 t yr<sup>-1</sup>, is located near Karnes, McMullen, Dewitt, and Live Oak County. Those

112 STEX emissions happened in counties with many oil and gas industry storage or oil wells,  
113 reflecting the emission process patterns.

114 Figure S4a shows the temporal profile of “np\_oilgas” adjusted emission by hourly total over the  
115 modeling domain from May 1st to Sep 30<sup>th</sup>. The oil and gas industry adjust emission reflects the  
116 flat industrial emission pattern caused by oil well or VOC evaporation processes, and the daytime  
117 hour (L.T. 9:00 to L.T. 16:00) has a higher (~ 15%) emission rate than night-time, and during the  
118 day there was an increase of 10 tons hr<sup>-1</sup> compared to 65 tons hr<sup>-1</sup> at night. This pattern is caused  
119 by Styrene emission from fracturing engines and other engine combustion for the oil and gas well  
120 operation. Further, Xylene contributes about 50% of STEX, and Toluene contributes about 40%  
121 of STEX. That increase shows that the adjusted HAPs emission inventory in “np\_oilgas” sector  
122 that relates to the oil well, storage tank, and the fracturing engine process is now being captured in  
123 adjusted inventory.

### 124 **3.2 The Imputation HAPs Emission in Point Source Non-Electricity Generation Unit** 125 **(ptnonipm)**

126 Fig. S5 and Table S5 shows all adjusted STEX emission of the industrial point source emission  
127 sector: “ptnonipm” (six states total, including F.L., TX, LA, MS, GA, and AL: 2315 t yr<sup>-1</sup>; model  
128 domain total: 1,483 t yr<sup>-1</sup>). Adjusted STEX emissions of “ptnonipm” have nearly half of that  
129 increase from Styrene (741 t yr<sup>-1</sup>) in Louisiana in the model domain.

130 Table S7 shows for "ptnonipm" that most of the Styrene increases are from manufacturing  
131 processes of synthetic rubber dryers (374 t yr<sup>-1</sup>), manufacturing fiberglass (134 t yr<sup>-1</sup>), and  
132 polystyrene (130 t yr<sup>-1</sup>). For Toluene, increased emissions were from manufacturing pesticides  
133 (105 t yr<sup>-1</sup>), paint evaporation (48 t yr<sup>-1</sup>), landfill fugitive emission (23 t yr<sup>-1</sup>), and chemical  
134 manufacturing and evaporation. The Xylenes imputations were from operating wastewater (33 t  
135 yr<sup>-1</sup>), water-base paint (29 t yr<sup>-1</sup>), solvent-based paint (22 t yr<sup>-1</sup>), coating (19 t yr<sup>-1</sup>), and sealing (18  
136 t yr<sup>-1</sup>) in chemical evaporation processes. The Ethylbenzene imputations were from the plastics  
137 production from the extruder (9 t yr<sup>-1</sup>), operating water-base paint (7 t yr<sup>-1</sup>), fugitive emission in  
138 chemical manufacturing (5 t yr<sup>-1</sup>), utilizing solvent-base paint (5 t yr<sup>-1</sup>), and wastewater treatment  
139 (4 t yr<sup>-1</sup>).

140 Figure S5 shows the spatial distribution of STEEX imputed emission for "ptnonipm." In this figure,  
141 the Toluene (Fig S5a) shows the most considerable emission difference (103 tons yr<sup>-1</sup>) happened  
142 near Baton Rouge, Louisiana. This adjusted emission in Baton Rouge is caused by producing  
143 pesticides. The most considerable Xylenes difference (Fig. S5b), 21 t yr<sup>-1</sup>, happened near  
144 Montgomery, Alabama. This Xylenes adjusted emission is caused by the building material  
145 industry (painting and sealing process) in the southwest of Montgomery. The largest Ethylbenzene  
146 difference (Fig. S5c), 5 t yr<sup>-1</sup>, is at Birmingham, Alabama. This emission is near the steel industry.  
147 The largest Styrene difference (Fig. S5d), 364 t yr<sup>-1</sup>, is near Lake Charles in Louisiana. This  
148 emission is caused by the polymer industry that produces synthetic rubber or other polymers.

149 Figure S4b shows a temporal profile of "ptnonipm" adjusted emission by hourly total over the  
150 modeling domain from May 1st to Sep 30<sup>th</sup>. The "ptnonipm" change emission reflects a relatively  
151 flat industrial emission pattern caused by polymer manufacturing or VOC evaporation. The  
152 daytime hour (L.T. 9:00 to L.T. 16:00) has a higher (~ 15%) emission rate than night-time, and  
153 during the day there was an increase of 3 tons hr<sup>-1</sup> compared to 19 tons hr<sup>-1</sup> at night. This pattern  
154 is caused by Xylene emission from operating wastewater and paint evaporation. Further, Styrene  
155 contributes more than 50% of STEEX, and Toluene contributes about 25% of adjusted STEEX. That  
156 increase shows that the adjusted HAPs emission inventory in the "ptnonipm" sector related to  
157 pesticide manufacturing, paint evaporation, building material industry, and steel industry, are now  
158 being captured in adjusted inventory for "ptnonipm".

159 Other missing STEEX emissions were found from the "pt\_oilgas" and "ptegu" sectors, but they were  
160 insignificant with a total emission of STEEX of 185 t yr<sup>-1</sup>. (Figure S6, S7).

161  
162

163 **Tables:**

164

165 **Table S1.** The Annual emission rates (metric tons yr<sup>-1</sup>) of Styrene, Benzene, Toluene,

166 Ethylbenzene, and Xylene (SBTEX) for the National Emission Inventory (Base)

| Emission Sectors <sup>#</sup>                                                 | Scenario | BENZENE<br>tons yr <sup>-1</sup> | TOLUENE<br>tons yr <sup>-1</sup> | XYLENES<br>tons yr <sup>-1</sup> | ETHYLBENZENE<br>tons yr <sup>-1</sup> | STYRENE<br>tons yr <sup>-1</sup> | Total<br>tons yr <sup>-1</sup> |
|-------------------------------------------------------------------------------|----------|----------------------------------|----------------------------------|----------------------------------|---------------------------------------|----------------------------------|--------------------------------|
| agriculture fire (agfire)                                                     | Base     | 1,128                            | 745                              | 0                                | 0                                     | 0                                | 1,873                          |
| commercial marine vehicle (cmv)                                               | Base     | 103                              | 16                               | 24                               | 10                                    | 11                               | 164                            |
| non-point source (nonpt)                                                      | Base     | 3,070                            | 16,932                           | 5,156                            | 1,188                                 | 777                              | 27,123                         |
| non-road vehicle (nonroad)                                                    | Base     | 4,752                            | 13,506                           | 14,265                           | 2,682                                 | 171                              | 35,376                         |
| on-road vehicle (onroad)                                                      | Base     | 10,495                           | <b>43,657</b>                    | <b>27,271</b>                    | <b>7,472</b>                          | 309                              | <b>89,204</b>                  |
| fire emission (ptfire)                                                        | Base     | <b>46,052</b>                    | 10,909                           | 4,355                            | 0                                     | 0                                | 61,316                         |
| rail road (rail)                                                              | Base     | 10                               | 14                               | 20                               | 8                                     | 9                                | 61                             |
| residential wood combustion (rwc)                                             | Base     | 395                              | 92                               | 26                               | 0                                     | 0                                | 513                            |
| non-point oil gas industry (np_oilgas)                                        | Base     | 5,421                            | 1,596                            | 3,097                            | 228                                   | 1                                | 10,343                         |
| electricity power plants unit (ptegu)                                         | Base     | 277                              | 129                              | 58                               | 34                                    | 7                                | 505                            |
| point source emission other than<br>electricity generation unit<br>(ptnonipm) | Base     | 7,305                            | 2,232                            | 2,351                            | 594                                   | <b>2,170</b>                     | 14,652                         |
| point source emission of oil and<br>gas industry (pt_oilgas)                  | Base     | 510                              | 252                              | 169                              | 29                                    | 1                                | 961                            |
| Total                                                                         | Base     | 79,518                           | 90,080                           | 56,792                           | 12,245                                | 3,456                            | 242,091                        |

167

168

169

170  
171  
172  
173  
174  
175

**Table S2.** The base CAMx model evaluation for ozone over modeling states: MB (mean bias), ME (mean error), RMSE (root mean square error), FB (fractional bias), FE (fractional error), NMB (normalized mean bias), NME (normalized mean error), and R (correlation coefficient).

| State (sites counts) | MB   | ME    | RMSE  | FB    | FE    | NMB   | NME   | R    |
|----------------------|------|-------|-------|-------|-------|-------|-------|------|
| Alabama (4)          | 7.6  | 12.43 | 16.09 | 28.09 | 52.33 | 27.03 | 44.19 | 0.67 |
| Florida (4)          | 7.27 | 11.37 | 15.07 | 24.44 | 35.93 | 22.47 | 35.14 | 0.55 |
| Louisiana (24)       | 2.93 | 9.99  | 12.85 | 4.26  | 53.34 | 10.92 | 37.27 | 0.77 |
| Mississippi (6)      | 8.92 | 11.97 | 15.15 | 30.99 | 39.52 | 27.87 | 37.4  | 0.67 |
| Texas (49)           | 0.3  | 8.85  | 12.08 | -3.05 | 45.98 | 1.02  | 30.4  | 0.79 |

176  
177  
178



179 **Table S3.** The physical parameters used in CAMx for reactive tracer modeling.

| No. | Model species name | Henry's law constants (M/atm) | T fact K | Molecular weight | Rscale |
|-----|--------------------|-------------------------------|----------|------------------|--------|
| 1   | TOLUENE            | 1.60E-01                      | 4000     | 92.14            | 1      |
| 2   | XYLENES            | 1.57E-01                      | 5633     | 106.1            | 1      |
| 3   | ETHYLBENZ          | 1.20E-01                      | 5100     | 106              | 1      |
| 4   | STYRENE            | 2.90E-01                      | 4800     | 104.1            | 1      |
| 5   | BENZENE            | 1.80E-01                      | 4000     | 78               | 1      |

180

181

182 **Table S4.** The chemical reaction parameters used in CAMx for reactive tracer modeling.

| Toxicants | Oxidants        | A (ppm <sup>-1</sup> min <sup>-1</sup> ) | Ea (K)    | B | T <sub>ref</sub> (K) |
|-----------|-----------------|------------------------------------------|-----------|---|----------------------|
| BENZENE   | OH              | 3.39E+03                                 | 1.90E+02  | 0 | 300                  |
| TOLUENE   | OH              | 2.66E+03                                 | -3.40E+02 | 0 | 300                  |
| XYLENES   | OH              | 2.41E+04                                 | 0.00E+00  | 0 | 300                  |
| XYLENES   | NO <sub>3</sub> | 5.27E-01                                 | 0.00E+00  | 0 | 300                  |
| ETHYLBENZ | OH              | 1.03E+04                                 | 0.00E+00  | 0 | 300                  |
| ETHYLBENZ | NO <sub>3</sub> | 1.77E-01                                 | 0.00E+00  | 0 | 300                  |
| STYRENE   | OH              | 8.56E+04                                 | 0.00E+00  | 0 | 300                  |
| STYRENE   | O <sub>3</sub>  | 2.51E-02                                 | 0.00E+00  | 0 | 300                  |
| STYRENE   | NO <sub>3</sub> | 2.21E+03                                 | 0.00E+00  | 0 | 300                  |

183

184

185 **Table S5.** The state total annual emissions (tons yr<sup>-1</sup>,) for the 2012 National Emission Inventory  
 186 (Base), and the emission scenario adjusted in this study (Adj).  
 187

| Sector                                                                  | Species      | Alabama |             | Florida |                 | Georgia |               | Louisiana |             | Mississippi |                | Texas |                  | Total by species |               | Sector Total |               |
|-------------------------------------------------------------------------|--------------|---------|-------------|---------|-----------------|---------|---------------|-----------|-------------|-------------|----------------|-------|------------------|------------------|---------------|--------------|---------------|
|                                                                         |              | Base    | Adj         | Base    | Adj             | Base    | Adj           | Base      | Adj         | Base        | Adj            | Base  | Adj              | Base             | Adj           | Base         | Adj           |
| electricity power plants unit (ptegu)                                   | Toluene      | 24      | +2.2 (9%)   | 51      | +0.35 (0.7%)    | 13      | +0.34 (3%)    | 17        | +1.2 (7%)   | 10          | +0.007 (0.06%) | 70    | +3.6 (5%)        | 185              | +7.7 (4%)     | 535          | +13 (2%)      |
|                                                                         | Xylenes      | 10      | +1.1 (11%)  | 26      | +0.16 (0.6%)    | 5.2     | +0.01 (0.2%)  | 11        | +0.48 (4%)  | 6.4         | +0.002 (0.03%) | 225   | +1.7 (1%)        | 283              | +3.5 (1%)     |              |               |
|                                                                         | Styrene      | 4.7     | +0.001 (0%) | 5.8     | +0.0003 (0.01%) | 0.34    | +0.001 (0.4%) | 0.54      | +0.02 (3%)  | 0.32        | 0              | 5.8   | +0.03 (0.5%)     | 17               | +0.05 (0.3%)  |              |               |
|                                                                         | Ethylbenzene | 5.7     | +0.55 (10%) | 14      | +0.08 (0.53%)   | 3.7     | +0.01 (0.3%)  | 4.6       | +0.29 (6%)  | 2.8         | +0.001 (0.03%) | 18    | +0.9 (5%)        | 49               | +1.8 (4%)     |              |               |
| point source emission of oil and gas industry (pt_oilgas)               | Toluene      | 13      | +6.4 (48%)  | 2.5     | +0.69 (28%)     | 4.2     | +0.09 (2%)    | 27        | +43 (160%)  | 17          | +1.7 (10%)     | 183   | +45 (24%)        | 246              | +96 (39%)     | 437          | +172 (39%)    |
|                                                                         | Xylenes      | 11      | +1.9 (17%)  | 1       | +0.87 (86%)     | 1.2     | +0.09 (7%)    | 14        | +30 (220%)  | 9.1         | +1.4 (15%)     | 107   | +29 (27%)        | 143              | +63 (44%)     |              |               |
|                                                                         | Styrene      | 1.1     | +0.01 (1%)  | 0.04    | +0.007 (18%)    | 0.2     | 0             | 0.5       | +0.21 (44%) | 0.33        | +0.05 (14%)    | 5.2   | +0.009 (0.2%)    | 7.4              | +0.28 (4%)    |              |               |
|                                                                         | Ethylbenzene | 3.2     | +0.55 (18%) | 0.40    | +0.07 (17%)     | 0.4     | +0.05 (12%)   | 4.7       | +5.7 (123%) | 3.6         | +0.49 (14%)    | 29    | +4.7 (16%)       | 41               | +12 (28%)     |              |               |
| point source emission other than electricity generation unit (ptnonipm) | Toluene      | 304     | +51 (17%)   | 350     | +126 (36%)      | 425     | +167 (39%)    | 609       | +194 (32%)  | 253         | +48 (19%)      | 1,039 | +88 (8%)         | 2,979            | +674 (23%)    | 9,951        | +2,315 (23%)  |
|                                                                         | Xylenes      | 705     | +84 (12%)   | 252     | +79 (31%)       | 70      | +146 (208%)   | 444       | +47 (11%)   | 344         | +39 (11%)      | 1,098 | +115 (10%)       | 2,914            | +510 (17%)    |              |               |
|                                                                         | Styrene      | 433     | +24 (5%)    | 723     | +48 (7%)        | 341     | +122 (36%)    | 236       | +420 (178%) | 251         | +35 (14%)      | 1,298 | +362 (28%)       | 3,282            | +1,012 (31%)  |              |               |
|                                                                         | Ethylbenzene | 85      | +12 (14%)   | 57      | +19 (34%)       | 115     | +26 (23%)     | 125       | +14 (11%)   | 79          | +15 (18%)      | 315   | +34 (10%)        | 776              | +119 (15%)    |              |               |
| non-point oil gas industry (np_oilgas)                                  | Toluene      | 133     | 0           | 12      | 0               | 0       | 0             | 1041      | 0           | 118         | 0              | 19    | +2,371 (12,605%) | 1,322            | +2,371 (179%) | 4,253        | +5,803 (136%) |
|                                                                         | Xylenes      | 209     | 0           | 5.9     | 0               | 0       | 0             | 2441      | 0           | 46          | 0              | 28    | +2,938 (10,339%) | 2,731            | +2,938 (108%) |              |               |
|                                                                         | Styrene      | 0.08    | 0           | 0.0003  | 0               | 0       | 0             | 0.33      | 0           | 0.03        | 0              | 0.76  | +1.9 (251%)      | 1.2              | +1.9 (160%)   |              |               |
|                                                                         | Ethylbenzene | 15      | 0           | 2       | 0               | 0       | 0             | 166       | 0           | 13          | 0              | 4.0   | +492 (12,423%)   | 200              | +492 (247%)   |              |               |
| State Total                                                             |              | 1,957   | +183 (9%)   | 1,501   | +275 (18%)      | 979     | 461 (47%)     | 5,141     | +756 (15%)  | 1,153       | +141 (12%)     | 4,445 | +6,487 (146%)    | 15,176           | +8,303 (55%)  | 15,176       | +8,303 (55%)  |

188

189

190

191

**Table S6.** The “np oilgas” imputation STEEX emissions by SCC code

| Species      | SCC        | t yr <sup>-1</sup> | Contribution | SCC description                                                                                                                                        |
|--------------|------------|--------------------|--------------|--------------------------------------------------------------------------------------------------------------------------------------------------------|
| Toluene      | 2310021010 | 729                | 30.8%        | Industrial Processes;Oil and Gas Exploration and Production;On-Shore Gas Production;Storage Tanks: Condensate                                          |
|              | 2310011201 | 589                | 24.8%        | Industrial Processes;Oil and Gas Exploration and Production;On-Shore Oil Production;Tank Truck/Railcar Loading: Crude Oil                              |
|              | 2310021400 | 581                | 24.5%        | Industrial Processes;Oil and Gas Exploration and Production;On-Shore Gas Production;Gas Well Dehydrators                                               |
|              | 2310010300 | 115                | 4.8%         | Industrial Processes;Oil and Gas Exploration and Production;Crude Petroleum;Oil Well Pneumatic Devices                                                 |
|              | 2310021300 | 61                 | 2.6%         | Industrial Processes;Oil and Gas Exploration and Production;On-Shore Gas Production;Gas Well Pneumatic Devices                                         |
| Xylenes      | 2310000330 | 2,062              | 70.2%        | Industrial Processes;Oil and Gas Exploration and Production;All Processes;Artificial Lift                                                              |
|              | 2310000550 | 426                | 14.5%        | Industrial Processes;Oil and Gas Exploration and Production;All Processes;Produced Water                                                               |
|              | 2310000660 | 91                 | 3.1%         | Industrial Processes;Oil and Gas Exploration and Production;All Processes;Hydraulic Fracturing Engines                                                 |
|              | 2310010300 | 73                 | 2.5%         | Industrial Processes;Oil and Gas Exploration and Production;Crude Petroleum;Oil Well Pneumatic Devices                                                 |
|              | 2310011000 | 62                 | 2.1%         | Industrial Processes;Oil and Gas Exploration and Production;On-Shore Oil Production;Total: All Processes                                               |
| Styrene      | 2310000660 | 1                  | 69.0%        | Industrial Processes;Oil and Gas Exploration and Production;All Processes;Hydraulic Fracturing Engines                                                 |
|              | 2310021302 | 0.47               | 24.0%        | Industrial Processes;Oil and Gas Exploration and Production;On-Shore Gas Production;Natural Gas Fired 4Cycle Rich Burn Compressor Engines 50 To 499 HP |
|              | 2310000330 | 0.13               | 6.6%         | Industrial Processes;Oil and Gas Exploration and Production;All Processes;Artificial Lift                                                              |
|              | 2310021202 | 0.01               | 0.4%         | Industrial Processes;Oil and Gas Exploration and Production;On-Shore Gas Production;Natural Gas Fired 4Cycle Lean Burn Compressor Engines 50 To 499 HP |
| Ethylbenzene | 2310010300 | 162                | 33.0%        | Industrial Processes;Oil and Gas Exploration and Production;Crude Petroleum;Oil Well Pneumatic Devices                                                 |
|              | 2310021010 | 109                | 22.1%        | Industrial Processes;Oil and Gas Exploration and Production;On-Shore Gas Production;Storage Tanks: Condensate                                          |
|              | 2310021400 | 53                 | 10.8%        | Industrial Processes;Oil and Gas Exploration and Production;On-Shore Gas Production;Gas Well Dehydrators                                               |
|              | 2310111401 | 34                 | 7.0%         | Industrial Processes;Oil and Gas Exploration and Production;On-Shore Oil Exploration;Oil Well Pneumatic Pumps                                          |
|              | 2310000550 | 28                 | 5.8%         | Industrial Processes;Oil and Gas Exploration and Production;All Processes;Produced Water                                                               |

192

193

194 **Table S7.** The “ptnonipm” imputation STEX emissions by SCC code

| Species      | SCC      | ton yr <sup>-1</sup> | Contribution | SCC description                                                                                                                                |
|--------------|----------|----------------------|--------------|------------------------------------------------------------------------------------------------------------------------------------------------|
| Toluene      | 30102601 | 105                  | 15.1%        | Industrial Processes;Chemical Manufacturing;Pesticides;Other Not Classified                                                                    |
|              | 50100701 | 48                   | 7.0%         | Chemical Evaporation;Surface Coating Operations;Surface Coating Application - General;Paint: Solvent-base                                      |
|              | 30588801 | 23                   | 3.3%         | Waste Disposal;Solid Waste Disposal - Government;Landfill Dump;Fugitive Emissions                                                              |
|              | 50100402 | 21                   | 3.0%         | Industrial Processes;Petroleum Industry;Fugitive Emissions;Specify in Comments Field                                                           |
|              | 33000199 | 20                   | 2.9%         | Industrial Processes;Miscellaneous Manufacturing Industries;Miscellaneous Industrial Processes;Other Not Classified                            |
| Xylenes      | 30700121 | 33                   | 6.2%         | Industrial Processes;Pulp and Paper and Wood Products;Sulfate (Kraft) Pulping;Wastewater: General                                              |
|              | 40200201 | 29                   | 5.5%         | Petroleum and Solvent Evaporation;Surface Coating Operations;Surface Coating Application - General;Paint: Water-base                           |
|              | 40200101 | 22                   | 4.2%         | Chemical Evaporation;Surface Coating Operations;Surface Coating Application - General;Paint: Solvent-base                                      |
|              | 40202501 | 19                   | 3.6%         | Chemical Evaporation;Surface Coating Operations;Miscellaneous Metal Parts;Coating Operation                                                    |
|              | 40201726 | 18                   | 3.4%         | Chemical Evaporation;Surface Coating Operations;Metal Can Coating;End Sealing Compound                                                         |
| Styrene      | 30102609 | 374                  | 36.4%        | Industrial Processes;Chemical Manufacturing;Synthetic Rubber (Manufacturing Only);Dryers                                                       |
|              | 30501215 | 134                  | 13.0%        | Industrial Processes;Mineral Products;Fiberglass Manufacturing;Curing Oven (Textile-type Fiber)                                                |
|              | 30800901 | 130                  | 12.6%        | Industrial Processes;Rubber and Miscellaneous Plastics Products;Plastic Miscellaneous Products;Polystyrene: General                            |
|              | 30800730 | 65                   | 6.3%         | Industrial Processes;Rubber and Miscellaneous Plastics Products;Fiberglass Resin Products;Mechanical Resin Application: (non-vapor-suppressed) |
|              | 30101809 | 45                   | 4.4%         | Industrial Processes;Chemical Manufacturing;Plastics Production;Extruder                                                                       |
| Ethylbenzene | 30101809 | 9                    | 7.3%         | Industrial Processes;Chemical Manufacturing;Plastics Production;Extruder                                                                       |
|              | 40200201 | 7                    | 6.0%         | Chemical Evaporation;Surface Coating Operations;Surface Coating Application - General;Paint: Water-base                                        |
|              | 30188801 | 5                    | 4.1%         | Industrial Processes;Chemical Manufacturing;Fugitive Emissions;General                                                                         |
|              | 40200101 | 5                    | 3.8%         | Chemical Evaporation;Surface Coating Operations;Surface Coating Application - General;Paint: Solvent-base                                      |
|              | 30600508 | 4                    | 3.2%         | Industrial Processes;Petroleum Industry;Wastewater Treatment;Oil/Water Separator                                                               |

195  
196

197 **Table S8.** The average concentration comparison between observational sites (Obs) and  
 198 adjustment case model result (Adj)  
 199

| Group    | Site ID   | FIPs  | Lat   | Lon    | Benzene (ppb) |       | Toluene (ppb) |       | Xylenes (ppb) |       | Ethylbenzene (ppb) |       | Styrene (ppb) |       | SBTEX (ppb) |       |
|----------|-----------|-------|-------|--------|---------------|-------|---------------|-------|---------------|-------|--------------------|-------|---------------|-------|-------------|-------|
|          |           |       |       |        | Obs           | Adj   | Obs           | Adj   | Obs           | Adj   | Obs                | Adj   | Obs           | Adj   | Obs         | Adj   |
| Airport  | 481210034 | 48121 | 33.21 | -97.19 | 0.131         | 0.088 | 0.149         | 0.207 | 0.080         | 0.105 | 0.023              | 0.021 | 0.003         | 0.001 | 0.385       | 0.422 |
| Airport  | 481830001 | 48183 | 32.37 | -94.71 | 0.500         | 0.152 | 0.272         | 0.116 | 0.158         | 0.073 | 0.037              | 0.016 | 0.022         | 0.009 | 0.989       | 0.366 |
| Airport  | 483390078 | 48339 | 30.35 | -95.42 | 0.194         | 0.132 | 0.277         | 0.264 | 0.135         | 0.118 | 0.043              | 0.032 | 0.022         | 0.064 | 0.671       | 0.610 |
| Airport  | 484393009 | 48439 | 32.98 | -97.06 | 0.129         | 0.128 | 0.142         | 0.350 | 0.075         | 0.153 | 0.027              | 0.038 | 0.007         | 0.003 | 0.380       | 0.671 |
| Industry | 220050004 | 22005 | 30.22 | -90.96 | 0.355         | 0.395 | 0.289         | 0.321 | 0.165         | 0.101 | 0.049              | 0.033 | 0.032         | 0.031 | 0.890       | 0.881 |
| Industry | 220330009 | 22033 | 30.46 | -91.17 | 0.272         | 0.488 | 0.388         | 0.545 | 0.240         | 0.211 | 0.063              | 0.060 | 0.034         | 0.092 | 0.998       | 0.910 |
| Industry | 480391003 | 48039 | 29.01 | -95.39 | 0.161         | 0.122 | 0.172         | 0.099 | 0.087         | 0.046 | 0.027              | 0.012 | 0.006         | 0.007 | 0.452       | 0.285 |
| Industry | 481670005 | 48167 | 29.38 | -94.93 | 0.421         | 0.182 | 0.291         | 0.108 | 0.277         | 0.075 | 0.089              | 0.017 | 0.013         | 0.007 | 1.091       | 0.389 |
| Industry | 482010024 | 48201 | 29.9  | -95.32 | 0.270         | 0.248 | 0.373         | 0.648 | 0.314         | 0.255 | 0.091              | 0.067 | 0.027         | 0.048 | 1.075       | 1.266 |
| Industry | 482010036 | 48201 | 29.77 | -95.1  | 0.940         | 1.049 | 0.741         | 0.477 | 0.575         | 0.309 | 0.155              | 0.115 | 0.126         | 0.081 | 2.536       | 2.031 |
| Industry | 482010057 | 48201 | 29.73 | -95.23 | 1.248         | 0.820 | 0.739         | 0.762 | 0.462         | 0.343 | 0.155              | 0.101 | 0.055         | 0.142 | 2.661       | 2.168 |
| Industry | 482010058 | 48201 | 29.77 | -95.03 | 0.360         | 0.980 | 0.345         | 0.408 | 0.266         | 0.294 | 0.056              | 0.097 | 0.020         | 0.059 | 1.047       | 1.838 |
| Industry | 482010061 | 48201 | 29.61 | -95.01 | 0.461         | 0.260 | 0.323         | 0.182 | 0.164         | 0.090 | 0.067              | 0.024 | 0.055         | 0.013 | 1.070       | 0.570 |
| Industry | 482010069 | 48201 | 29.7  | -95.26 | 0.204         | 0.488 | 0.415         | 0.622 | 0.278         | 0.278 | 0.076              | 0.077 | 0.114         | 0.103 | 1.087       | 1.568 |
| Industry | 482010307 | 48201 | 29.71 | -95.25 | 0.334         | 0.531 | 0.469         | 0.698 | 0.412         | 0.310 | 0.124              | 0.086 | 0.099         | 0.116 | 1.438       | 1.742 |
| Industry | 482010617 | 48201 | 29.82 | -94.99 | 0.194         | 0.551 | 0.299         | 0.245 | 0.120         | 0.184 | 0.027              | 0.052 | 0.006         | 0.028 | 0.646       | 1.060 |
| Industry | 482010803 | 48201 | 29.76 | -95.17 | 0.284         | 0.811 | 0.882         | 0.514 | 0.304         | 0.260 | 0.062              | 0.089 | 0.052         | 0.070 | 1.583       | 1.744 |
| Industry | 482011015 | 48201 | 29.76 | -95.08 | 1.064         | 0.912 | 1.266         | 0.393 | 0.457         | 0.263 | 0.108              | 0.099 | 0.096         | 0.065 | 2.991       | 1.667 |
| Industry | 482011035 | 48201 | 29.73 | -95.25 | 0.252         | 0.579 | 0.498         | 0.666 | 0.338         | 0.299 | 0.080              | 0.086 | 0.059         | 0.100 | 1.228       | 1.730 |
| Industry | 482011039 | 48201 | 29.67 | -95.12 | 0.222         | 0.430 | 0.335         | 0.384 | 0.201         | 0.173 | 0.042              | 0.047 | 0.015         | 0.047 | 0.815       | 1.034 |
| Industry | 482011049 | 48201 | 29.71 | -95.22 | 0.420         | 0.671 | 0.569         | 0.760 | 0.341         | 0.341 | 0.108              | 0.095 | 0.023         | 0.151 | 1.462       | 2.019 |
| Industry | 482015504 | 48201 | 29.7  | -95.11 | 0.383         | 0.533 | 0.638         | 0.411 | 0.348         | 0.185 | 0.093              | 0.054 | 0.043         | 0.058 | 1.503       | 1.240 |
| Industry | 482016000 | 48201 | 29.68 | -95.25 | 0.232         | 0.370 | 0.529         | 0.553 | 0.397         | 0.244 | 0.088              | 0.064 | 0.033         | 0.089 | 1.280       | 1.319 |
| Industry | 482450009 | 48245 | 30.03 | -94.07 | 0.207         | 0.437 | 0.228         | 0.257 | 0.177         | 0.120 | 0.029              | 0.037 | 0.002         | 0.010 | 0.642       | 0.861 |
| Industry | 482450011 | 48245 | 29.89 | -93.99 | 0.558         | 0.333 | 0.240         | 0.105 | 0.227         | 0.050 | 0.052              | 0.017 | 0.007         | 0.014 | 1.084       | 0.452 |
| Industry | 482450014 | 48245 | 29.96 | -93.89 | 0.448         | 0.246 | 1.045         | 0.089 | 0.213         | 0.040 | 0.065              | 0.013 | 0.010         | 0.052 | 1.781       | 0.441 |
| Industry | 482450017 | 48245 | 29.98 | -93.95 | 0.335         | 0.373 | 0.214         | 0.170 | 0.175         | 0.081 | 0.056              | 0.032 | 0.090         | 0.078 | 0.870       | 0.734 |
| Industry | 482450018 | 48245 | 29.94 | -94    | 0.312         | 0.406 | 0.208         | 0.181 | 0.158         | 0.085 | 0.053              | 0.034 | 0.012         | 0.042 | 0.742       | 0.748 |
| Industry | 482450019 | 48245 | 29.89 | -93.97 | 0.393         | 0.483 | 0.206         | 0.142 | 0.152         | 0.060 | 0.054              | 0.021 | 0.012         | 0.020 | 0.817       | 0.726 |
| Industry | 482451035 | 48245 | 29.97 | -94.01 | 0.208         | 0.373 | 0.291         | 0.169 | 0.209         | 0.080 | 0.044              | 0.031 | 0.010         | 0.041 | 0.761       | 0.692 |
| Industry | 482451050 | 48245 | 30.06 | -94.09 | 0.315         | 0.548 | 0.276         | 0.343 | 0.250         | 0.156 | 0.074              | 0.046 | 0.014         | 0.010 | 0.929       | 1.103 |
| Rural    | 220330013 | 22033 | 30.7  | -91.05 | 0.168         | 0.135 | 0.124         | 0.158 | 0.065         | 0.065 | 0.025              | 0.019 | 0.026         | 0.007 | 0.409       | 0.385 |
| Rural    | 220470009 | 22047 | 30.22 | -91.31 | 0.184         | 0.175 | 0.200         | 0.135 | 0.119         | 0.045 | 0.033              | 0.014 | 0.020         | 0.012 | 0.556       | 0.382 |
| Rural    | 481211007 | 48121 | 33.04 | -97.13 | 0.082         | 0.088 | 0.199         | 0.250 | 0.081         | 0.114 | 0.012              | 0.026 | 0.001         | 0.002 | 0.375       | 0.480 |
| Rural    | 481390016 | 48139 | 32.48 | -97.02 | 0.102         | 0.074 | 0.102         | 0.125 | 0.056         | 0.064 | 0.020              | 0.014 | 0.003         | 0.002 | 0.282       | 0.279 |
| Rural    | 481391044 | 48139 | 32.17 | -96.87 | 0.110         | 0.043 | 0.095         | 0.064 | 0.056         | 0.027 | 0.020              | 0.008 | 0.008         | 0.001 | 0.290       | 0.142 |
| Rural    | 481671034 | 48167 | 29.25 | -94.86 | 0.121         | 0.070 | 0.098         | 0.047 | 0.035         | 0.026 | 0.018              | 0.006 | 0.000         | 0.001 | 0.273       | 0.151 |
| Rural    | 482010029 | 48201 | 30.03 | -95.67 | 0.217         | 0.104 | 0.223         | 0.320 | 0.130         | 0.129 | 0.041              | 0.034 | 0.011         | 0.004 | 0.622       | 0.590 |
| Rural    | 482030002 | 48203 | 32.66 | -94.16 | 0.279         | 0.100 | 0.197         | 0.084 | 0.102         | 0.077 | 0.025              | 0.013 | 0.037         | 0.002 | 0.640       | 0.276 |
| Rural    | 482311006 | 48231 | 33.15 | -96.11 | 0.123         | 0.042 | 0.122         | 0.077 | 0.062         | 0.032 | 0.023              | 0.009 | 0.004         | 0.001 | 0.333       | 0.160 |
| Rural    | 482511008 | 48251 | 32.46 | -97.16 | 0.113         | 0.061 | 0.109         | 0.109 | 0.049         | 0.069 | 0.023              | 0.012 | 0.005         | 0.001 | 0.298       | 0.252 |
| Rural    | 482570005 | 48257 | 32.56 | -96.31 | 0.110         | 0.042 | 0.077         | 0.081 | 0.038         | 0.034 | 0.016              | 0.009 | 0.000         | 0.001 | 0.242       | 0.167 |
| Urban    | 481130069 | 48113 | 32.82 | -96.86 | 0.081         | 0.168 | 0.239         | 0.521 | 0.332         | 0.217 | 0.054              | 0.058 | 0.003         | 0.005 | 0.708       | 0.969 |
| Urban    | 482010055 | 48201 | 29.69 | -95.49 | 0.178         | 0.200 | 0.213         | 0.706 | 0.157         | 0.275 | 0.048              | 0.072 | 0.011         | 0.006 | 0.606       | 1.260 |
| Urban    | 484391018 | 48439 | 32.72 | -97.1  | 0.144         | 0.119 | 0.288         | 0.364 | 0.128         | 0.191 | 0.028              | 0.041 | 0.033         | 0.005 | 0.620       | 0.721 |
| Urban    | 484391062 | 48439 | 32.65 | -97.2  | 0.087         | 0.107 | 0.225         | 0.343 | 0.086         | 0.194 | 0.022              | 0.035 | 0.014         | 0.005 | 0.434       | 0.685 |

200  
201

202 **Figures:**  
 203

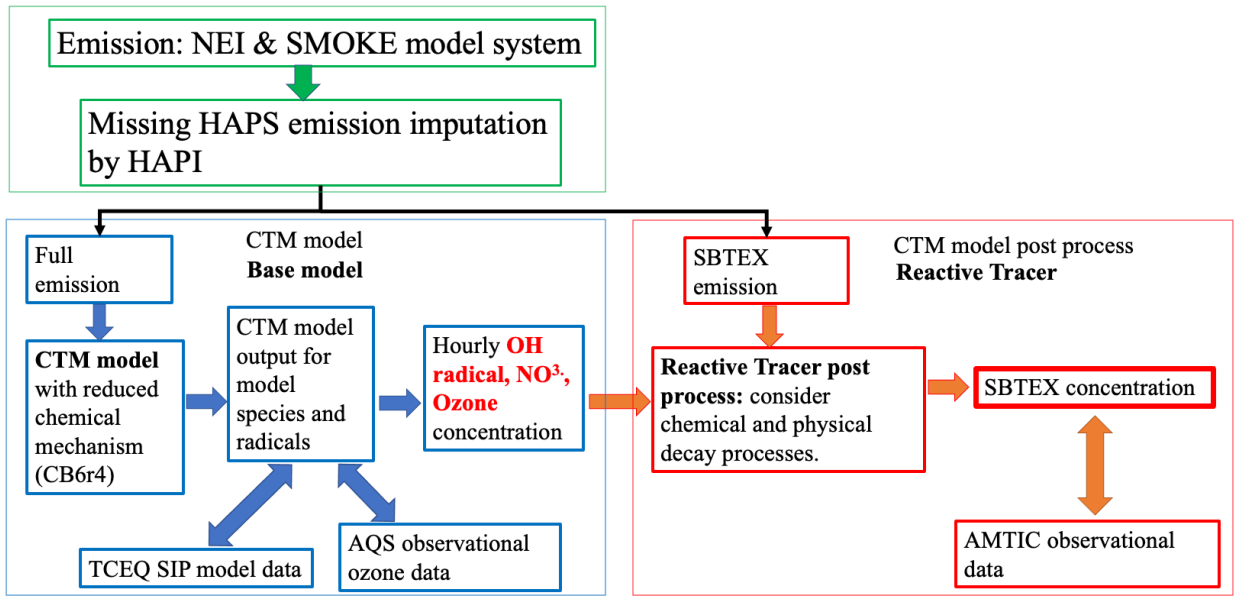

204 **Figure S1.** Toxic air quality modeling system schematic: The green rectangles are emission  
 205 processes; the blue rectangles are the base CTM model process for estimating the concentration  
 206 of oxidants; the red rectangles are the Reactive Tracer process for estimating individual SBTEX  
 207 concentration.  
 208  
 209

210

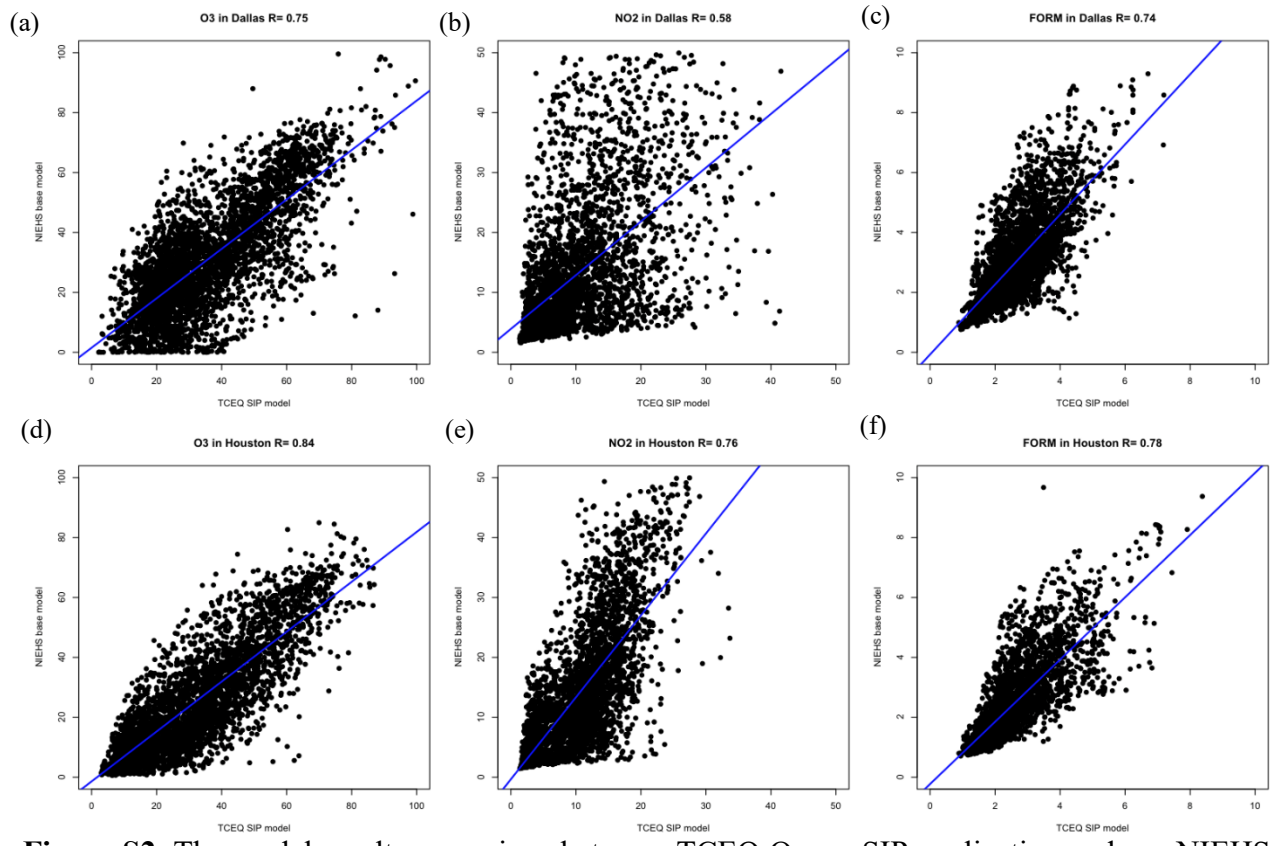

211

212 **Figure S2.** The model result comparison between TCEQ Ozone SIP application and our NIEHS  
213 base model result: a) ozone, b) NO<sub>2</sub>, c) formaldehyde in Dallas, Texas; d) ozone, e) NO<sub>2</sub>, and f)  
214 formaldehyde in Houston, Texas.

215

216

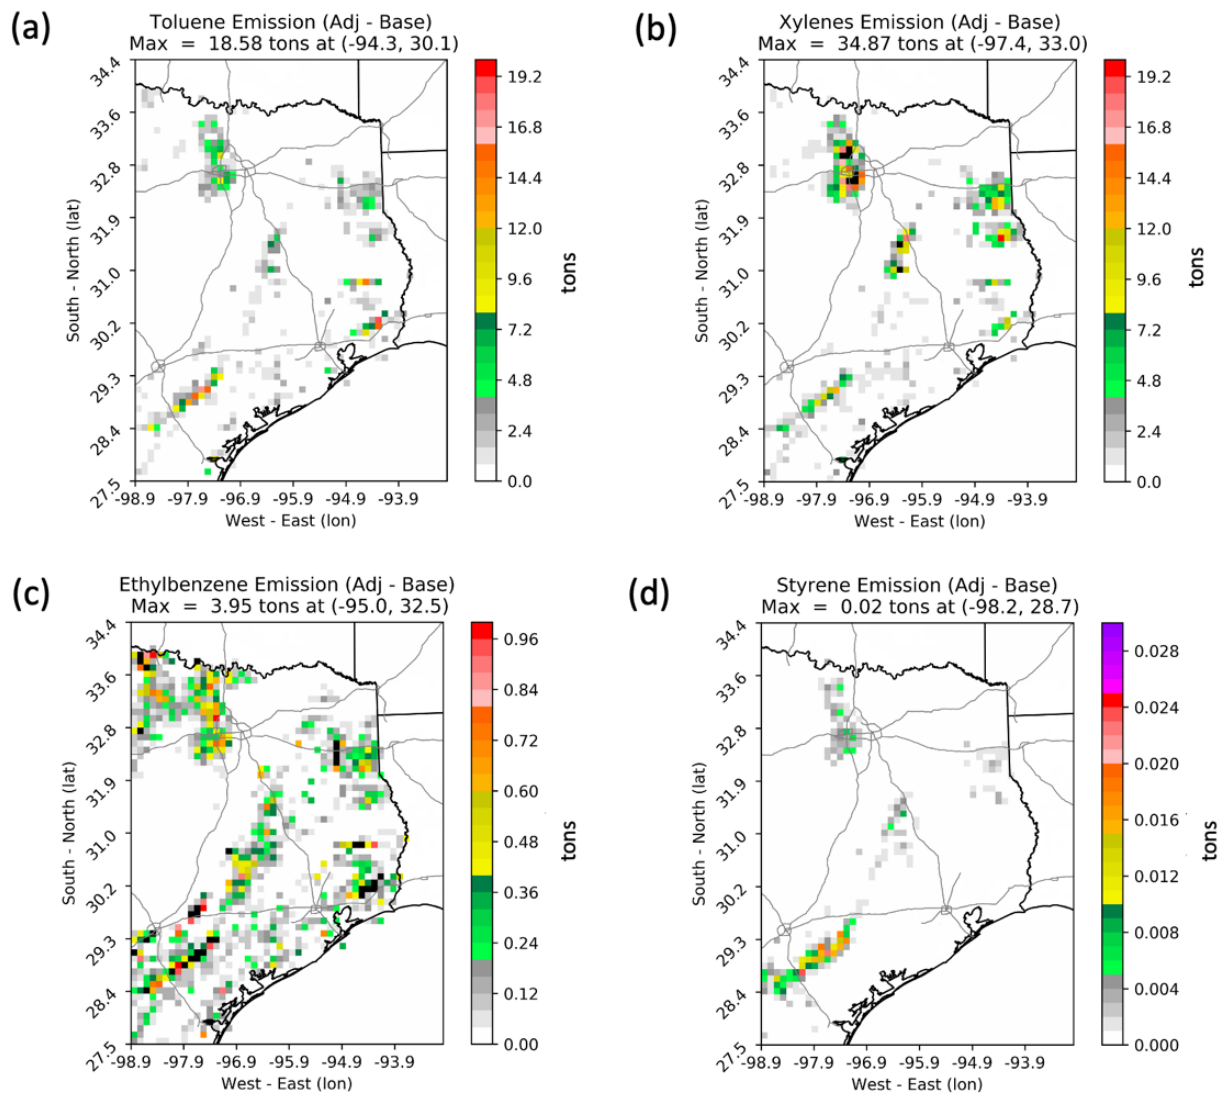

217  
 218  
 219 **Figure S3.** For the non-point source oil and gas industry emission sector (np\_oilgas) the increase  
 220 in annual emission rates for the 2012 Emission Inventory (Base), and the emission scenario  
 221 adjusted in this study (Adj) of (a) Toluene, (b) Xylenes, (c) Ethylbenzene, and (d) Styrene  
 222



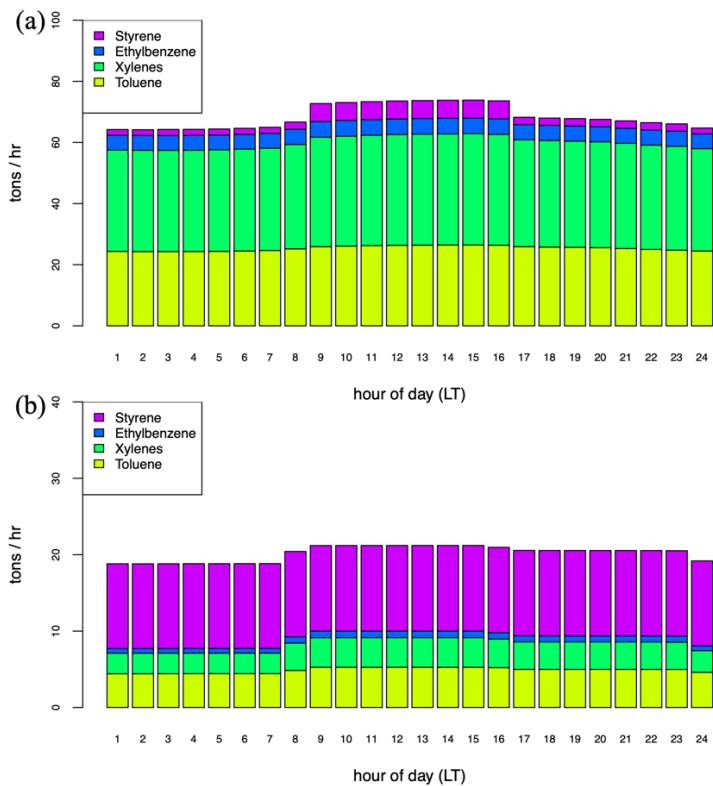

223  
 224 **Figure S4. (a)** For the “np\_oilgas” imputation emission (Adj - Base) from May 1<sup>st</sup> to September  
 225 30<sup>th</sup> over the entire 12×12 km model domain. The bars are the hourly total of Styrene, Toluene,  
 226 Ethylbenzene, and Xylenes (STEX) (tons hr<sup>-1</sup>), and **(b)** is for the “ptnonipm” imputation emission.  
 227

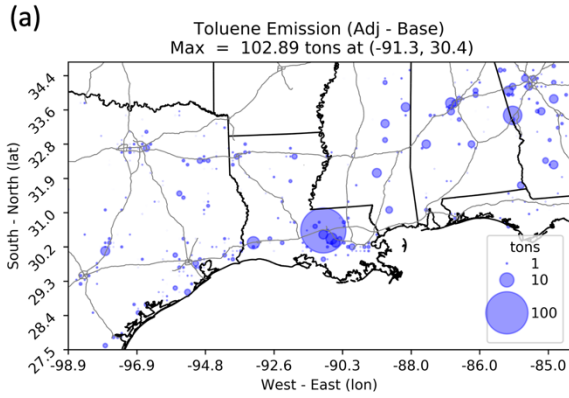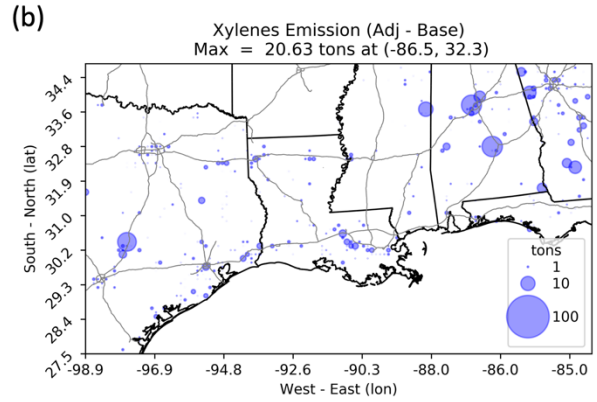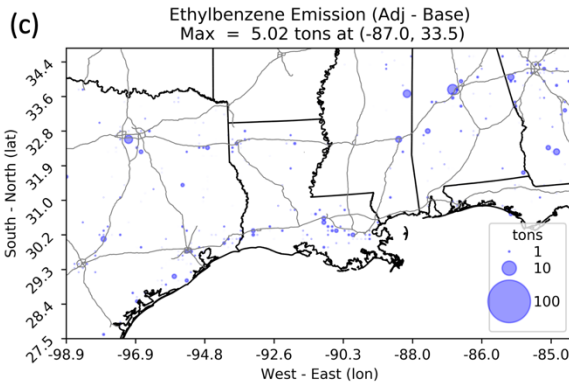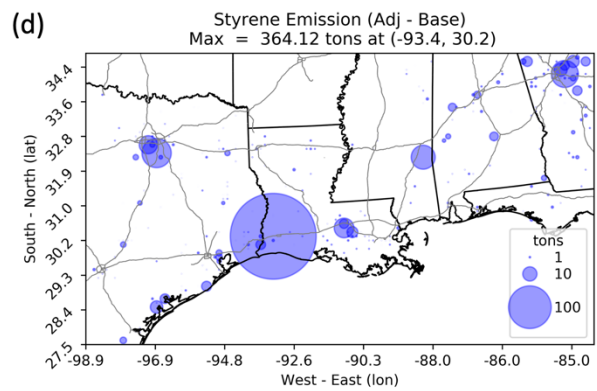

228  
229  
230  
231  
232  
233  
234  
235

**Figure S5.** For the industry point source sector without electricity power plant emissions (ptnonipm) the increase in annual emission rates for the 2012 Emission Inventory (Base), and the emission scenario adjusted in this study (Adj) for (a) Toluene, (b) Xylenes, (c) Ethylbenzene, and (d) Styrene,

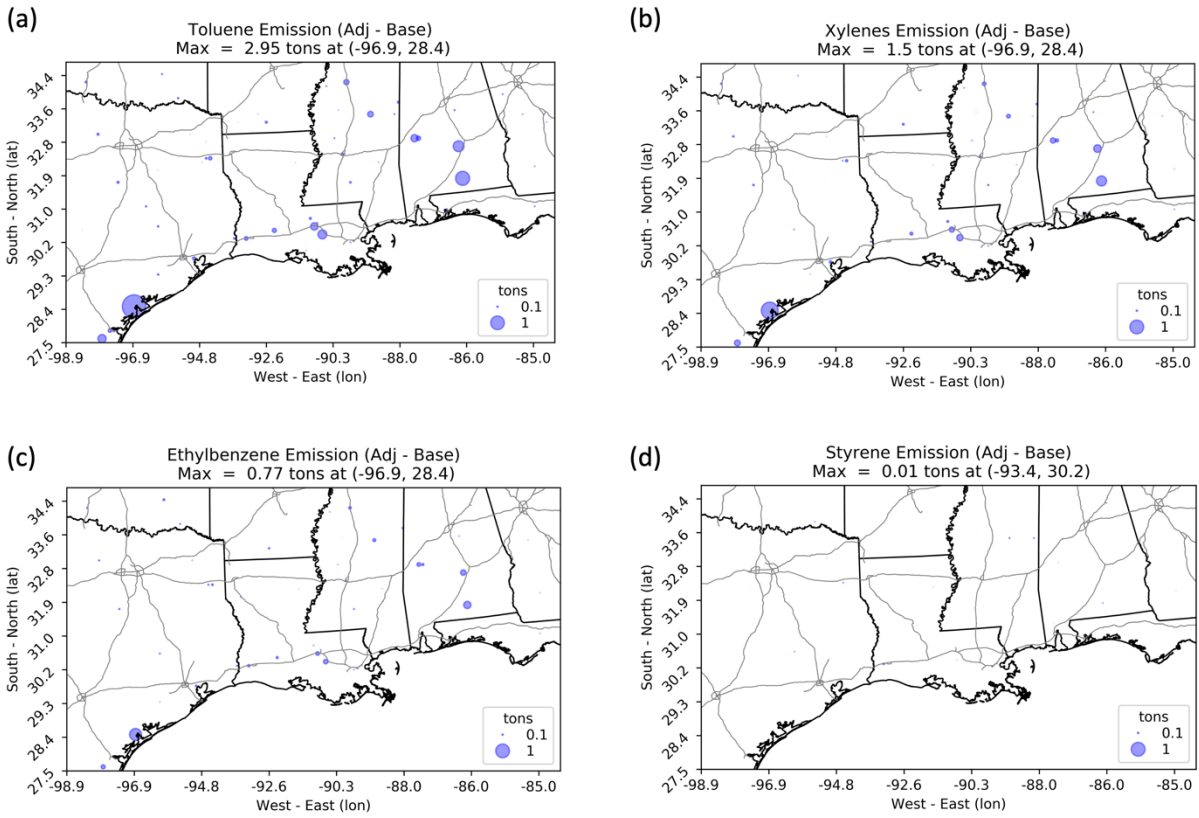

236  
237  
238  
239  
240

**Figure S6** Delta emission (Adj-Base) of (a) Toluene, (b) Xylenes, (c) Ethylbenzene, and (d) Styrene, in electricity generation power plant emission sector (ptegu)

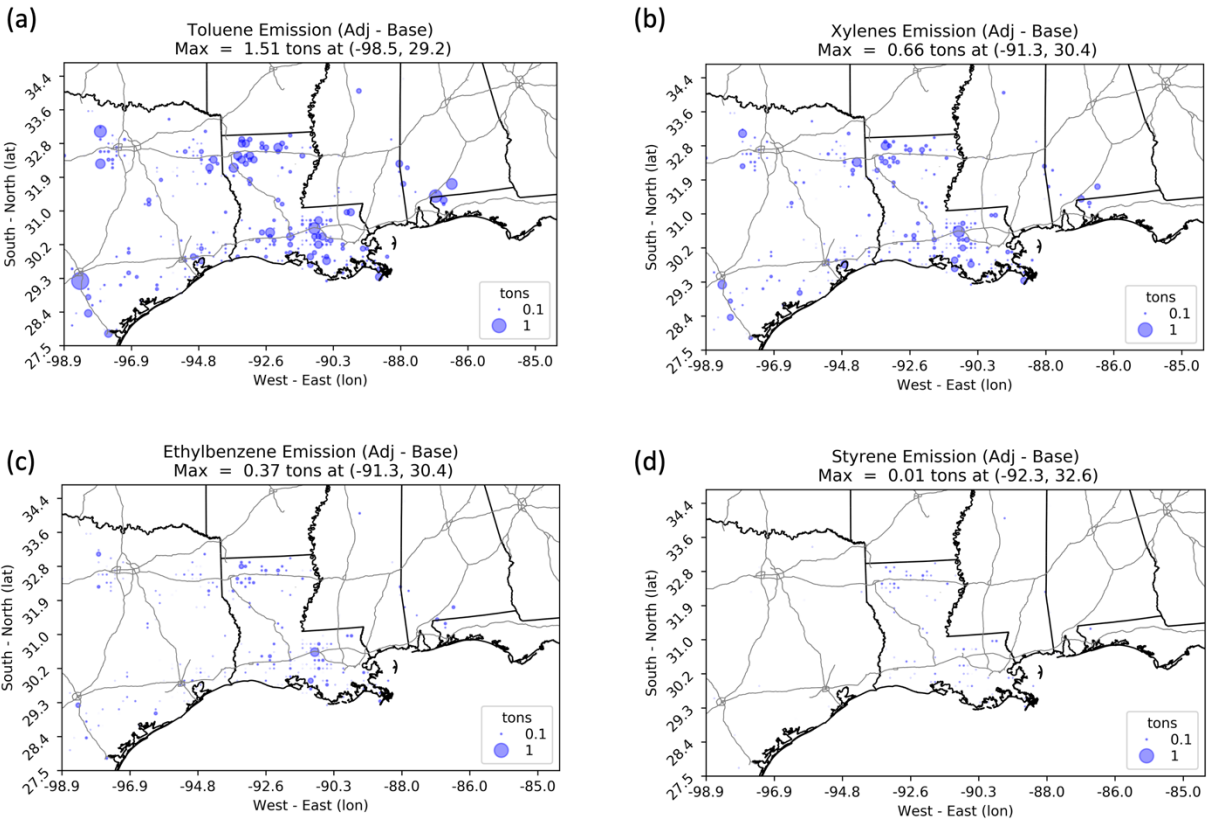

242  
243  
244  
245

**Figure S7** Delta emission (Adj-Base) of (a) Toluene, (b) Xylenes, (c) Ethylbenzene, and (d) Styrene, in point source oil and gas industry emission sector (pt\_oilgas)

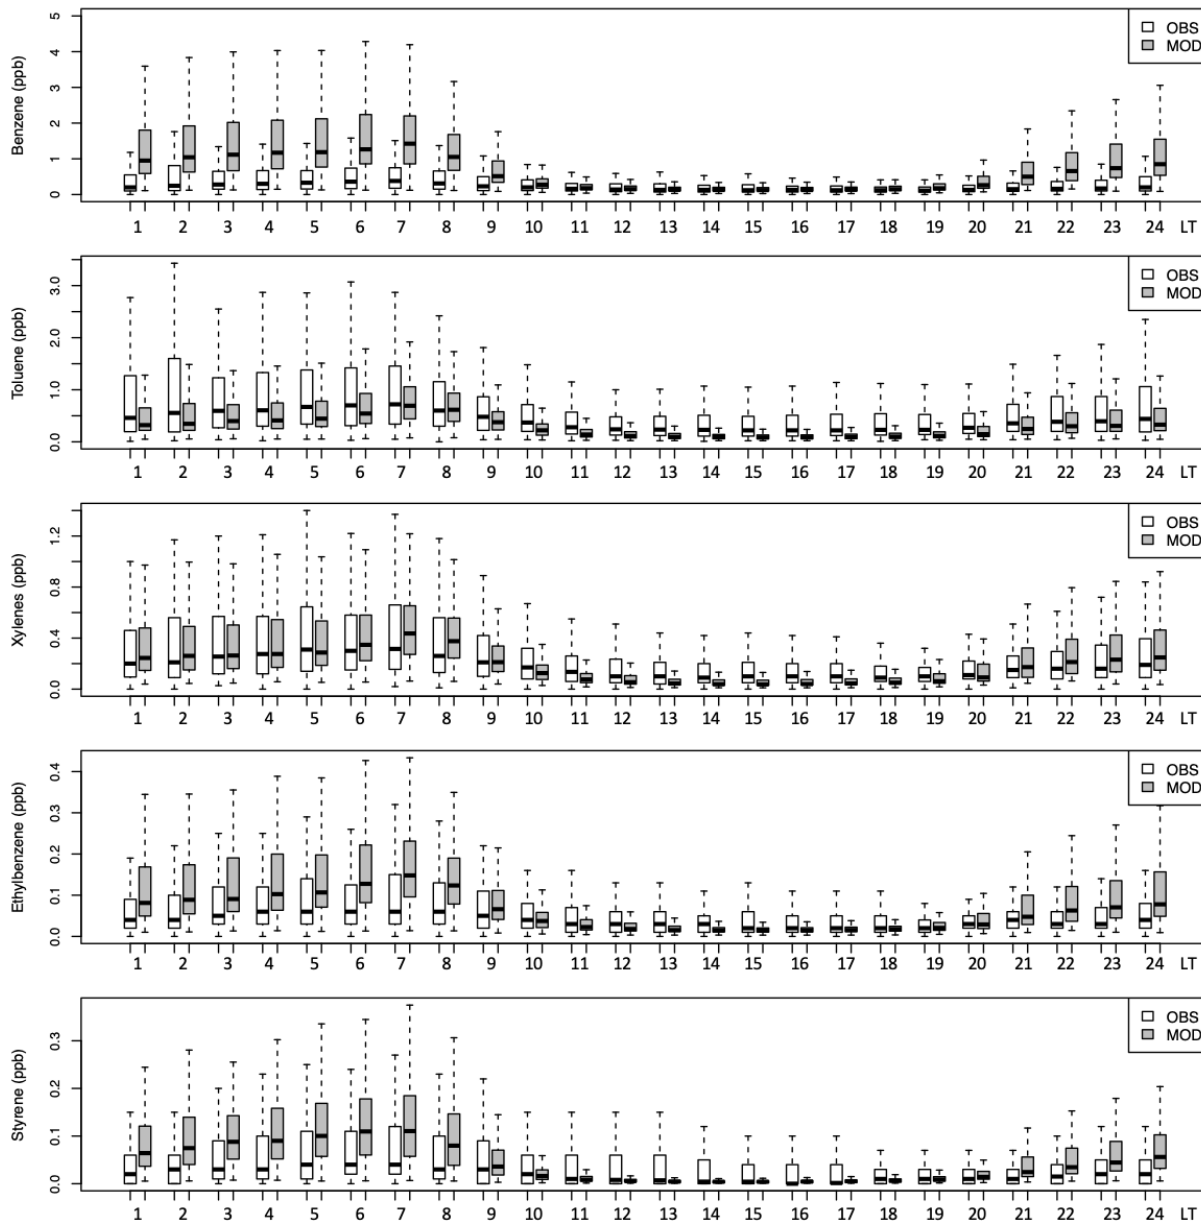

246  
 247 **Figure S8.** Diurnal pattern comparison of SBTEX in Houston (Site ID: 482010803, 482011015,  
 248 482010617) during the model simulation period (May 1<sup>st</sup>, 2012 to Sep 30<sup>th</sup>, 2012) for (a)  
 249 Benzene; (b) Toluene; (c) Xylenes; (d) Ethylbenzene, and (e) Styrene.

250  
 251  
 252

(a)

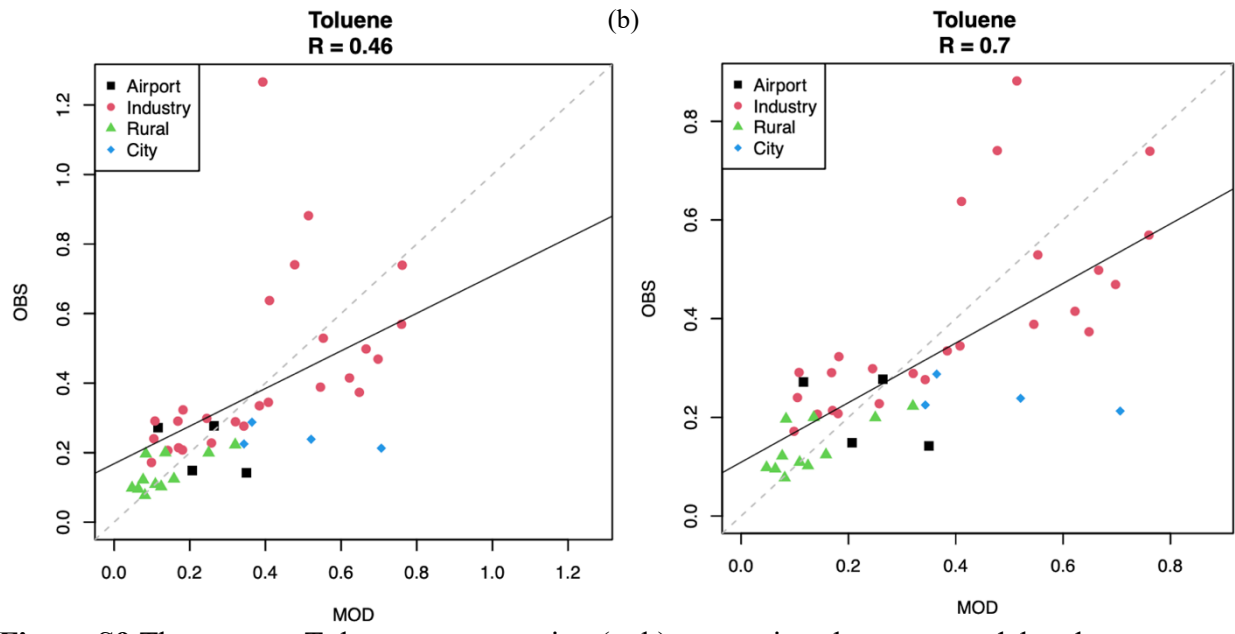

253  
 254 **Figure S9** The average Toluene concentration (ppb) comparison between model and  
 255 observational data. (a) is original, and (b) is after removing two sites (Site ID: 482011015 and  
 256 482450014) with a significant underestimate.  
 257  
 258

259 **Reference:**  
260  
261 Safety flare for burning combustible gas - has tangential inlet for non-flammable gas between  
262 housing and stack.

263 Hogrefe, C., Gilliam, R., Mathur, R., Henderson, B., Sarwar, G., Appel, K. W., Pouliot, G.,  
264 Willison, J., Miller<sup>2</sup>, R., Vukovich<sup>1</sup>, J., Eyth, A., Talgo, K., Allen, C., and Foley, K.:  
265 CMAQv5.3.2 ozone simulations over the Northern Hemisphere: model performance and  
266 sensitivity to model configuration  
267 Office of Research and Development, 2021.

268 NASA: OZONE & AIR QUALITY: <https://ozoneaq.gsfc.nasa.gov>, last

269 Ramboll: CAMx7.00 User's Guide: [https://camx-](https://camx-wp.azurewebsites.net/Files/CAMxUsersGuide_v7.00.pdf)  
270 [wp.azurewebsites.net/Files/CAMxUsersGuide\\_v7.00.pdf](https://camx-wp.azurewebsites.net/Files/CAMxUsersGuide_v7.00.pdf), last

271 Ramboll: Speciation Tool User's Guide:  
272 [https://www.cmascenter.org/speciation\\_tool/documentation/5.0/Ramboll\\_sptool\\_users\\_guide\\_V](https://www.cmascenter.org/speciation_tool/documentation/5.0/Ramboll_sptool_users_guide_V5.pdf)  
273 [5.pdf](https://www.cmascenter.org/speciation_tool/documentation/5.0/Ramboll_sptool_users_guide_V5.pdf), last

274 Simon, H., Beck, L., Bhave, P. V., Divita, F., Hsu, Y., Luecken, D., Mobley, J. D., Pouliot, G.  
275 A., Reff, A., Sarwar, G., and Strum, M.: The development and uses of EPA's SPECIATE  
276 database, Atmospheric Pollution Research, 1, 196-206, 10.5094/apr.2010.026, 2010.

277 Steyn, D. G. and Rao, S. T.: Air Pollution Modeling and Its Application XX, Regional and  
278 intercontinental modelling, 2010.

279 TCEQ: TCEQ 2012 Modeling Platform Technical Support Document, 2016.

280 USEPA: EPA's report on the environment: <https://cfpub.epa.gov/roe/>, last

281 USEPA: Guidance on the Use of models and other analyses for demonstrating attainment of air  
282 quality goals for ozone, PM<sub>2.5</sub> and Regional Haze, 2006.

283 USEPA: SPECIATE: <https://www.epa.gov/air-emissions-modeling/speciate>, last access: Nov 29.

284 USEPA: National Emissions Inventory (NEI) 2011 Version 6 Air Emissions Modeling Platform  
285 (EMP): <https://www.epa.gov/air-emissions-modeling/emissions-modeling-platforms>, last access:  
286 JAN, 27th, 2022.

287 Yarwood, G. and Jung, J.: UPDATES TO THE CARBON BOND MECHANISM FOR  
288 VERSION 6 (CB6), 2010.  
289
